# Supplementary material for: Changes of the erythrocyte phenotype and blood biochemistry in dairy calves during the first ten weeks of age
Source: PeerJ journal article supplement (doi:10.7717/peerj.7248), 2019-07-16

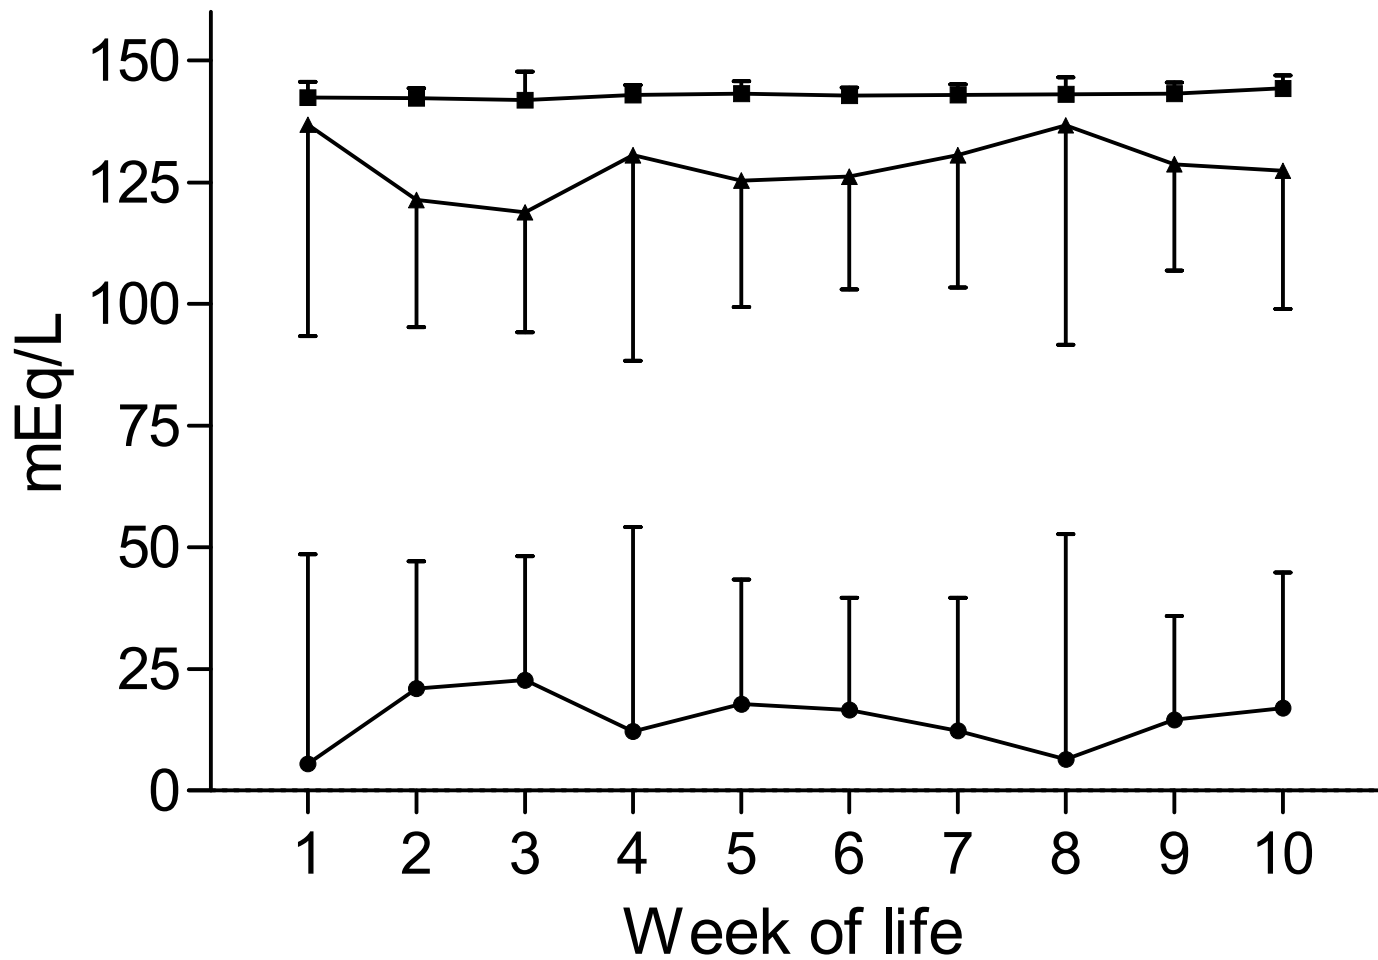

Supplement: Supplementary_Data_Figure_2.pdf [file Supplementary_Data_Figure_2.pdf]
